# Supplementary material for: Environmental DNA metabarcoding accelerates integral conservation assessments and species rediscoveries in tropical biodiversity hotspots
Source: Research Square preprint supplement (doi:10.21203/rs.3.rs-6542547/v1), 2025-05-22
Supplement: Supplementary file 2 [file aadae26f8c54500d3aad3b7d.docx]

**Appendix S1**

**Supplement to:**

**Environmental DNA metabarcoding accelerates integral conservation assessments and species rediscoveries in tropical biodiversity hotspots**

**Plewnia *et al.***

**Basic code for processing of demultiplexed MiSeq sequences.**

## merge all F and R files individually at once:

# 1. pear script:

ls | awk '{print "pear -q 20 -j 12 -v 50 -f "$0" -r "$0" -o "$0}' | grep -v _R2_ | sed 's/_R1_/_R2_/2' | sed -r 's/_S[0-9] {1,3}_L001_R1_001.fastq.gz//2' >pear.sh

# 2. make it executable:

chmod +x pear.sh

# 3. execute pear for all files:

./pear.sh

## quality filtering for all files at once:

# 1. fast script:

ls *assembled.fastq | awk '{print "fastq_quality_filter -Q33 -q 30 -p 90 -i "$0" | fastq_to_fasta -Q33 -o "$0}' | sed 's/assembled.fastq/fasta/2' >fast.sh

# 2. make it executable:

chmod +x fast.sh

# 3. execute FASTX Toolkit for all files:

./fast.sh

## cutting off primer sequences (replace all characters that are not A,T,G or C with a point) and (optionally) removing short sequences. Replace characters in italics with the specific primer sequence, primer length for trimming, filtering length and desired file name respectively. Further, all files are merged into a single .fas file:

grep -E "^*FwdPRIMERSEQ*.**REVERSECOMPLIMENTOFRevPRIMERSEQ*$" *fasta | sed -r 's/:[A-Z]{*FwdPRIMERLENGTH*}/\t/' | sed -r 's/[A-Z]{*RevPRIMERLENGTH*}$//' | awk 'length ($2)>=*100*{print ">"$1"\n"$2}' > *name*.fas

## dereplicate and cluster sequences (../ redirects to the usearch executable file in the folder above the current working directory. If usearch bin is stored somewhere else, replace ../ with the appropriate path).

## dereplicate Sequences:

../usearch -fastx_uniques *name*.fas -fastaout *name*.derep -sizeout

## Cluster OTUs (here, all sequences that occur less than 5 times are discarded; the command -cluster_otus by default produces 97% radius OTUs):

../usearch -cluster_otus *name*.derep -otus *name*.OTU.fas -minsize *5* -relabel OTU

Replace – with _ in the .fas header:

sed -i 's/-/_/g' *name*.fas

## making OTU table:

../usearch -otutab name.fas -otus name.OTU.fas -otutabout name.Tab.txt

## run BLAST search:

blastn -db /*path*/*nt* -query *name*.OTU.fas -num_threads 24 -max_target_seqs 10 -out *name*_OTUs.out -outfmt "6 qseqid sseqid pident length mismatch gapopen qstart qend sstart send evalue bitscore staxids"

## assign taxon names to OTUs:

/*path*/blast2taxonomy_v1.4.2.py -i *name*_OTUs.out -o *name*_blast2tax.txt -t 6

**Table S1.** Details on sampling localities, time points and total water volume sampled. To protect sensitive populations of threatened species from poaching, coordinates appear in a cropped format and are available in detail upon request from authors only.

| **ID** | **locality name, province** | **coordinates** | **altitude** | **date** | **volume (l)** |
| --- | --- | --- | --- | --- | --- |
| PA1 up F1 | Palanda 1, Zamora Chinchipe | -4.64, -79.18 | 2400 | 18 July 2023 | 0.6 |
| PA1 up F2 | Palanda 1, Zamora Chinchipe | -4.64, -79.18 | 2400 | 18 July 2023 | 0.6 |
| PA1 down F1 | Palanda 1, Zamora Chinchipe | -4.64, -79.18 | 2400 | 18 July 2023 | 1.0 |
| PA1 down F2 | Palanda 1, Zamora Chinchipe | -4.64, -79.18 | 2400 | 18 July 2023 | 0.6 |
| PA2 F1 | Palanda 2, Zamora Chinchipe | -4.64, -79.19 | 2580 | 18 July 2023 | 0.6 |
| PA2 F2 | Palanda 2, Zamora Chinchipe | -4.64, -79.19 | 2580 | 18 July 2023 | 0.4 |
| PA3 F1 | Valladolid, Zamora Chinchipe | -4.47, -79.14 | 2600 | 18 July 2023 | 0.8 |
| PA3 F2 | Valladolid, Zamora Chinchipe | -4.47, -79.14 | 2600 | 18 July 2023 | 0.5 |
| AZ1.1 | Abra de Zamora 1, Zamora Chinchipe | -3.97, -79.10 | 2050 | 26 July 2023 | 1.0 |
| AZ1.2 | Abra de Zamora 1, Zamora Chinchipe | -3.97, -79.10 | 2050 | 26 July 2023 | 0.8 |
| AZ2.1 | Abra de Zamora 2, Zamora Chinchipe | -3.97, -79.10 | 2050 | 26 July 2023 | 1.2 |
| AZ2.2 | Abra de Zamora 2, Zamora Chinchipe | -3.97, -79.10 | 2050 | 26 July 2023 | 1.3 |
| AZ2.3 | Abra de Zamora 2, Zamora Chinchipe | -3.97, -79.10 | 2050 | 26 July 2023 | 2.2 |
| AZ3.1 | Abra de Zamora 3, Zamora Chinchipe | -3.97, -79.08 | 2020 | 26 July 2023 | 2.5 |
| AZ3.2 | Abra de Zamora 3, Zamora Chinchipe | -3.97, -79.08 | 2020 | 26 July 2023 | 2.5 |
| ZR1.1 | Abra de Zamora - old road - 1, Loja | -3.98, -79.13 | 2670 | 27 July 2023 | 0.3 |
| ZR1.2 | Abra de Zamora - old road - 1, Loja | -3.98, -79.13 | 2670 | 27 July 2023 | 0.25 |
| ZR2.1 | Abra de Zamora - old road - 2, Zamora Chinchipe | -3.96, -79.11 | 2210 | 27 July 2023 | 1.1 |
| ZR2.2 | Abra de Zamora - old road - 2, Zamora Chinchipe | -3.96, -79.11 | 2210 | 27 July 2023 | 0.9 |
| ZR3.1 | Abra de Zamora - old road - 3, Zamora Chinchipe | -3.96, -79.11 | 2210 | 27 July 2023 | 0.9 |
| ZR3.2 | Abra de Zamora - old road - 3, Zamora Chinchipe | -3.96, -79.11 | 2210 | 27 July 2023 | 1.0 |
| ZR4.1 | Abra de Zamora - old road - 4, Zamora Chinchipe | -3.96, -79.11 | 2210 | 27 July 2023 | 1.5 |
| ZR4.2 | Abra de Zamora - old road - 4, Zamora Chinchipe | -3.96, -79.11 | 2210 | 27 July 2023 | 1.3 |
| GL1.1 | Gualaceo - Limón road 1, Azuay | -2.95, -78.70 | 3140 | 29 July 2023 | 0.6 |
| GL1.2 | Gualaceo - Limón road 1, Azuay | -2.95, -78.70 | 3140 | 29 July 2023 | 0.5 |
| GL2.1 | Gualaceo - Limón road 2, Azuay | -2.97, -78.68 | 3220 | 29 July 2023 | 1.1 |
| GL2.2 | Gualaceo - Limón road 2, Azuay | -2.97, -78.68 | 3220 | 29 July 2023 | 1.0 |
| GL2.3 | Gualaceo - Limón road 2, Azuay | -2.97, -78.68 | 3220 | 29 July 2023 | 1.0 |
| GL3.1 | Gualaceo - Limón road 3, Morona Santiago | -3.00, -78.65 | 3210 | 29 July 2023 | 1.0 |
| GL3.2 | Gualaceo - Limón road 3, Morona Santiago | -3.00, -78.65 | 3210 | 29 July 2023 | 0.7 |
| GL4.1 | Gualaceo - Limón road 4, Morona Santiago | -3.01, -78.61 | 2740 | 29 July 2023 | 0.8 |
| GL4.2 | Gualaceo - Limón road 4, Morona Santiago | -3.01, -78.61 | 2740 | 29 July 2023 | 0.6 |
| GL4.3 | Gualaceo - Limón road 4, Morona Santiago | -3.01, -78.61 | 2740 | 29 July 2023 | 0.6 |
| GL5.1 | Gualaceo - Limón road 5, Azuay | -2.99, -78.67 | 3260 | 29 July 2023 | 1.1 |
| GL5.2 | Gualaceo - Limón road 5, Azuay | -2.99, -78.67 | 3260 | 29 July 2023 | 0.9 |
| GL6.1 | Gualaceo - Limón road 6, Azuay | -2.98, -78.68 | 3220 | 29 July 2023 | 0.7 |
| CS1.1 | Chico Soldados 1, Azuay | -2.93, -79.23 | 3300 | 31 July 2023 | 1.0 |
| CS1.2 | Chico Soldados 1, Azuay | -2.93, -79.23 | 3300 | 31 July 2023 | 0.6 |
| CS1.3 | Chico Soldados 1, Azuay | -2.93, -79.23 | 3300 | 31 July 2023 | 0.8 |
| CS2.1 | Chico Soldados 2, Azuay | -2.93, -79.18 | 3150 | 31 July 2023 | 3.7 |
| PC1.1 | Parque Nacional Cajas 1, Azuay | -2.77, -79.23 | 4030 | 1 August 2023 | 0.6 |
| PC1.2 | Parque Nacional Cajas 1, Azuay | -2.77, -79.23 | 4030 | 1 August 2023 | 0.5 |
| PC1.3 | Parque Nacional Cajas 1, Azuay | -2.77, -79.23 | 4030 | 1 August 2023 | 0.4 |
| PC1.4 | Parque Nacional Cajas 1, Azuay | -2.77, -79.23 | 4030 | 1 August 2023 | 0.4 |
| PC2.1 | Parque Nacional Cajas 2, Azuay | -2.76, -79.22 | 3980 | 1 August 2023 | 0.6 |
| PC2.2 | Parque Nacional Cajas 2, Azuay | -2.76, -79.22 | 3980 | 1 August 2023 | 0.4 |
| PC2.3 | Parque Nacional Cajas 2, Azuay | -2.76, -79.22 | 3980 | 1 August 2023 | 1.15 |
| PC3.1 | Parque Nacional Cajas 3, Azuay | -2.76, -79.21 | 3860 | 1 August 2023 | 0.9 |
| PC3.2 | Parque Nacional Cajas 3, Azuay | -2.76, -79.21 | 3860 | 1 August 2023 | 0.7 |
| PC3.3 | Parque Nacional Cajas 3, Azuay | -2.76, -79.21 | 3860 | 1 August 2023 | 0.5 |
| PC3.4 | Parque Nacional Cajas 3, Azuay | -2.76, -79.21 | 3860 | 1 August 2023 | 0.6 |
| CN1.1 | Cerro Negro 1, Azuay | -3.16, -78.84 | 3070 | 2 August 2023 | 0.7 |
| CN1.2 | Cerro Negro 1, Azuay | -3.16, -78.84 | 3070 | 2 August 2023 | 0.5 |
| CN1.3 | Cerro Negro 1, Azuay | -3.16, -78.84 | 3070 | 2 August 2023 | 0.6 |
| CN2.1 | Cerro Negro 2, Azuay | -3.15, -78.84 | 3080 | 2 August 2023 | 0.5 |
| CN2.2 | Cerro Negro 2, Azuay | -3.15, -78.84 | 3080 | 2 August 2023 | 0.5 |
| CN2.3 | Cerro Negro 2, Azuay | -3.15, -78.84 | 3080 | 2 August 2023 | 0.6 |
| CN3.1 | Cerro Negro 3, Azuay | -3.15, -78.84 | 3080 | 2 August 2023 | 0.4 |
| CN3.2 | Cerro Negro 3, Azuay | -3.15, -78.84 | 3080 | 2 August 2023 | 0.3 |
| CN3.3 | Cerro Negro 3, Azuay | -3.15, -78.84 | 3080 | 2 August 2023 | 0.4 |
| CN3.4 | Cerro Negro 3, Azuay | -3.15, -78.84 | 3080 | 2 August 2023 | 0.4 |
| GC1.1 | Gallo Cresta 1, Azuay | -3.19, -78.83 | 3170 | 3 August 2023 | 0.9 |
| GC1.2 | Gallo Cresta 1, Azuay | -3.19, -78.83 | 3170 | 3 August 2023 | 0.7 |
| GC1.3 | Gallo Cresta 1, Azuay | -3.19, -78.83 | 3170 | 3 August 2023 | 0.7 |
| GC1.4 | Gallo Cresta 1, Azuay | -3.19, -78.83 | 3170 | 3 August 2023 | 0.7 |
| GC2.1 | Gallo Cresta 2, Azuay | -3.19, -78.83 | 3170 | 3 August 2023 | 1.0 |
| GC2.2 | Gallo Cresta 2, Azuay | -3.19, -78.83 | 3170 | 3 August 2023 | 0.7 |
| GC2.3 | Gallo Cresta 2, Azuay | -3.19, -78.83 | 3170 | 3 August 2023 | 0.8 |
| GC2.4 | Gallo Cresta 2, Azuay | -3.19, -78.83 | 3170 | 3 August 2023 | 0.8 |
| GC3.1 | Gallo Cresta 3, Azuay | -3.19, -78.83 | 3170 | 3 August 2023 | 0.5 |
| GC3.2 | Gallo Cresta 3, Azuay | -3.19, -78.83 | 3170 | 3 August 2023 | 0.4 |
| GC4.1 | Gallo Cresta 4, Azuay | -3.20, -78.84 | 3130 | 3 August 2023 | 0.7 |
| GC4.2 | Gallo Cresta 4, Azuay | -3.20, -78.84 | 3130 | 3 August 2023 | 0.8 |
| GC5.1 | Gallo Cresta 5, Azuay | -3.19, -78.85 | 3260 | 3 August 2023 | 0.15 |
| PZ1.1 | Puzhio 1, Azuay | -2.98, -78.73 | 3120 | 4 August 2023 | 1.6 |
| PZ1.2 | Puzhio 1, Azuay | -2.98, -78.73 | 3120 | 4 August 2023 | 0.45 |
| PZ2.1 | Puzhio 2, Azuay | -2.97, -78.72 | 3110 | 4 August 2023 | 0.6 |
| PZ2.2 | Puzhio 2, Azuay | -2.97, -78.72 | 3110 | 4 August 2023 | 0.45 |
| RP1.1 | Molleturo 1, Azuay | -2.74, -79.38 | 1670 | 6 August 2023 | 1.3 |
| RP1.2 | Molleturo 1, Azuay | -2.74, -79.38 | 1670 | 6 August 2023 | 1.4 |
| QC1.1 | Páramo de Quimsacocha 1, Azuay | -3.05, -79.22 | 3760 | 21 August 2023 | 0.3 |
| QC1.2 | Páramo de Quimsacocha 1, Azuay | -3.05, -79.22 | 3760 | 21 August 2023 | 0.3 |
| QC2.1 | Páramo de Quimsacocha 2, Azuay | -3.06, -79.23 | 3760 | 21 August 2023 | 0.25 |
| QC2.2 | Páramo de Quimsacocha 2, Azuay | -3.06, -79.23 | 3760 | 21 August 2023 | 0.25 |
| QC3.1 | Páramo de Quimsacocha 3, Azuay | -3.10, -79.21 | 3300 | 21 August 2023 | 0.6 |
| TYa | undisclosed locality, Tandayapa, Pichincha | -0.00, -78.67 | 1760 | 11 August 2023 | 2.0 |
| TYb | undisclosed locality, Tandayapa, Pichincha | -0.00, -78.67 | 1740 | 11 August 2023 | 2.0 |
| TYc | undisclosed locality, Tandayapa, Pichincha | -0.00, -78.67 | 1710 | 11 August 2023 | 1.0 |
| TYd | undisclosed locality, Tandayapa, Pichincha | -0.01, -78.68 | 2220 | 11 August 2023 | 2.0 |
| TYe | undisclosed locality, Tandayapa, Pichincha | -0.01, -78.68 | 2240 | 11 August 2023 | 2.0 |
| TYf | undisclosed locality, Tandayapa, Pichincha | -0.03, -78.71 | 2230 | 12 August 2023 | 2.0 |
| TYg | undisclosed locality, Tandayapa, Pichincha | -0.01, -78.68 | 2290 | 12 August 2023 | 2.0 |
| TYh | undisclosed locality, Tandayapa, Pichincha | -0.03, -78.64 | 2070 | 12 August 2023 | 1.0 |
| TYi | undisclosed locality, Tandayapa, Pichincha | 0.01, -78.67 | 1600 | 12 August 2023 | 0.9 |
| TYj | undisclosed locality, Tandayapa, Pichincha | 0.01, -78.67 | 1600 | 12 August 2023 | 0.9 |
| TYk | undisclosed locality, Tandayapa, Pichincha | 0.01, -78.67 | 1600 | 12 August 2023 | 0.9 |
| TYl | undisclosed locality, Tandayapa, Pichincha | 0.01, -78.67 | 1600 | 12 August 2023 | 0.9 |
| TYm | undisclosed locality, Tandayapa, Pichincha | -0.01, -78.68 | 2260 | 13 August 2023 | 1.0 |
| TYn | undisclosed locality, Tandayapa, Pichincha | -0.02, -78.71 | 2070 | 13 August 2023 | 1.0 |
| TYo | undisclosed locality, Tandayapa, Pichincha | -0.02, -78.71 | 2050 | 13 August 2023 | 2.0 |
| TYp | undisclosed locality, Tandayapa, Pichincha | -0.02, -78.71 | 2060 | 13 August 2023 | 1.0 |
| TYq | undisclosed locality, Tandayapa, Pichincha | -0.02, -78.71 | 2060 | 13 August 2023 | 1.0 |
| TYr | undisclosed locality, Tandayapa, Pichincha | -0.01, -78.68 | 2090 | 14 August 2023 | 3.0 |

**Figure S1.** Relative read composition for vertebrate classes for (A) 12S (12S-V5) and (B) 16S (MiAmphi_L). Note that both primer pairs did not yield any reptiles. Further, the amphibian-specific 16S primer pair barely amplified birds.

A


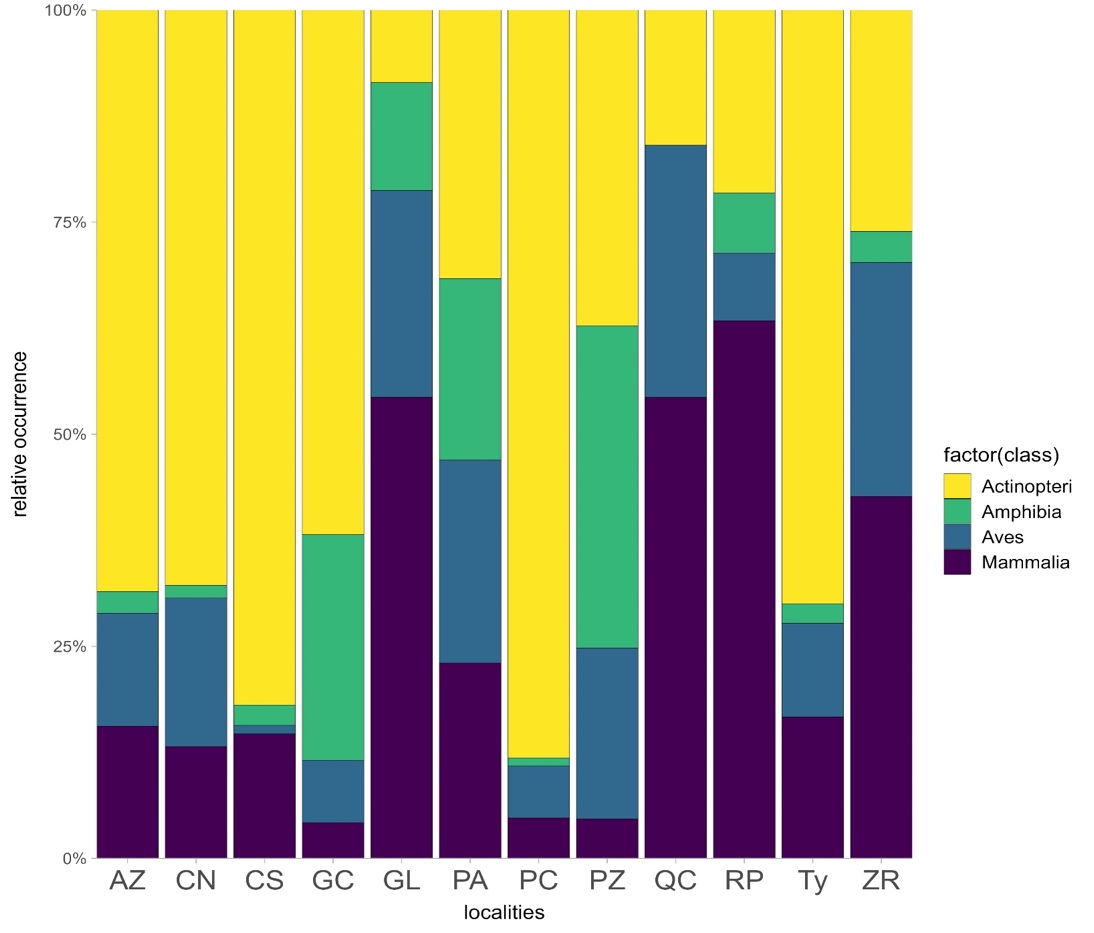


B


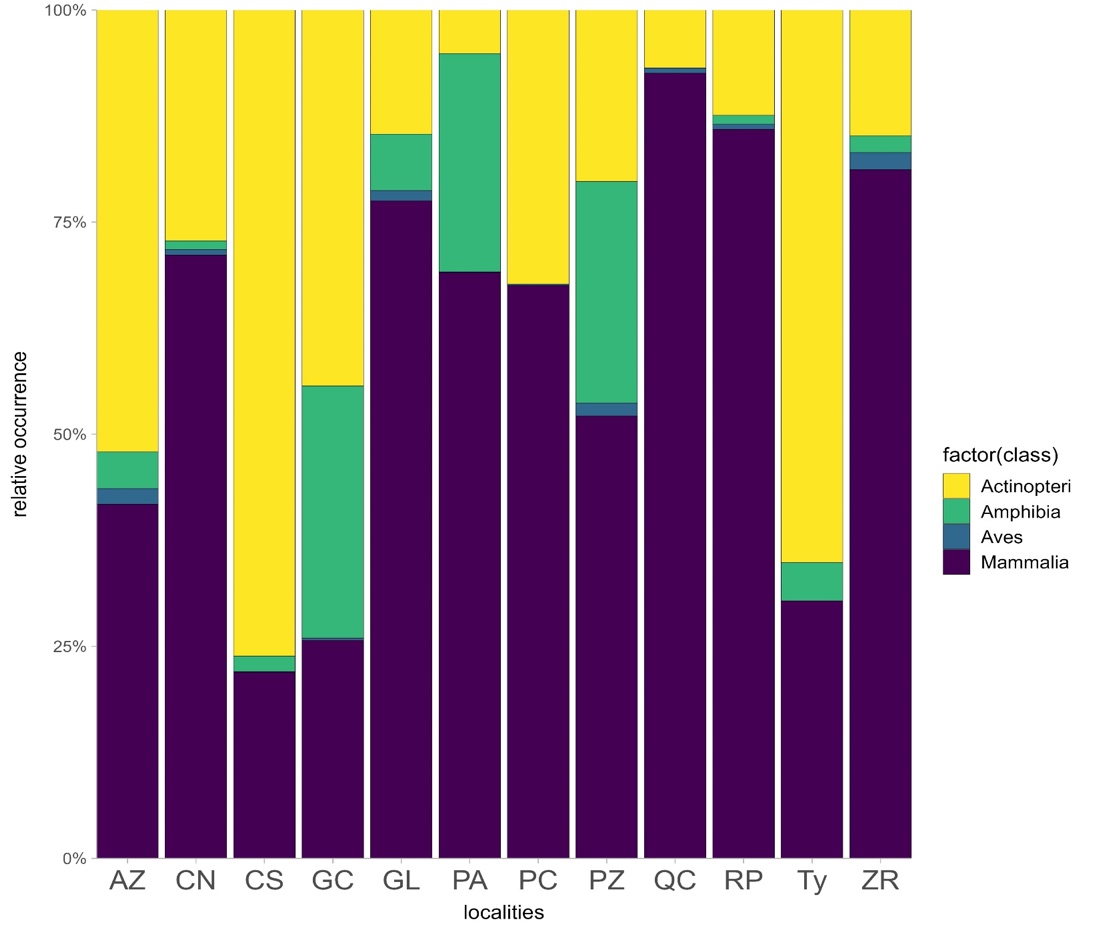


**Figure S2.** Supplemental figures highlighting (A) the endemism among Siluriformes OTUs versus non-native OTUs. (B) Species composition with high abundance of likely native Siluriformes among all fish. (C) Species composition when considering only OTUs with high taxonomic resolution (i.e. max. 3 % difference in Blastn percent identity). Figures are based on the general vertebrate (12S) dataset.

A


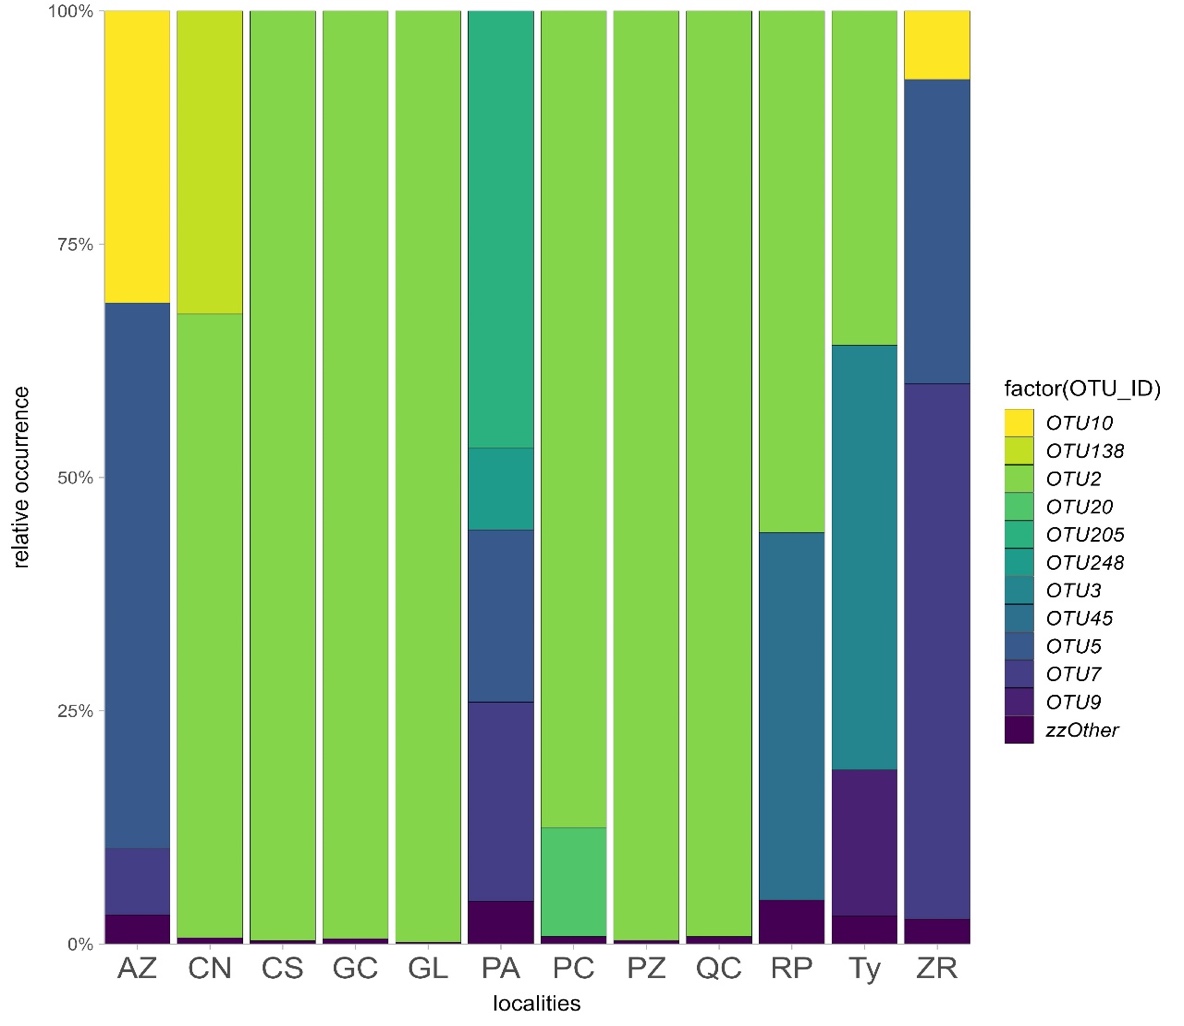


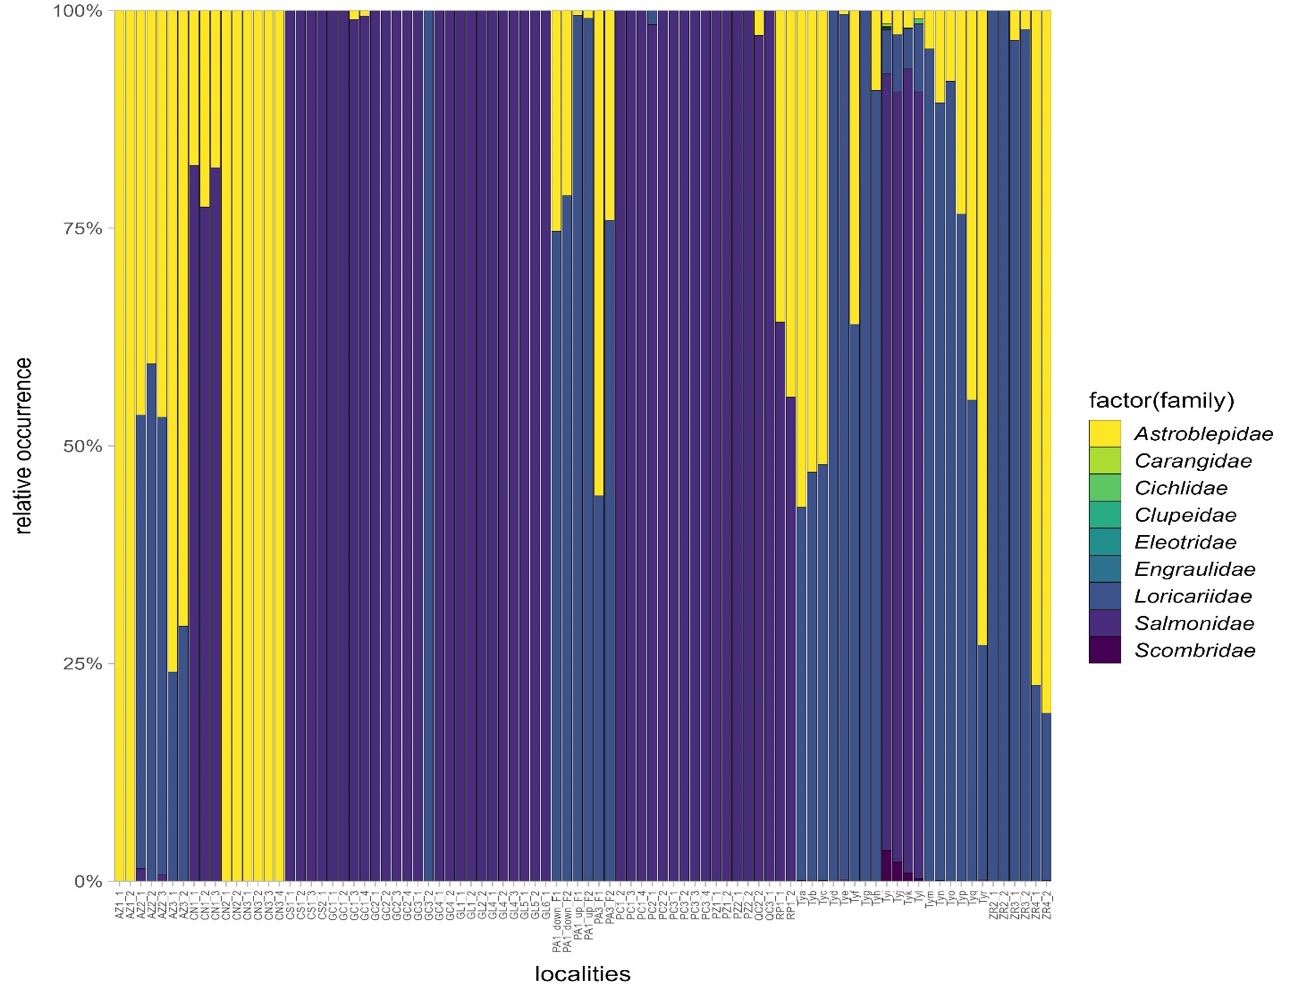
.

C

B


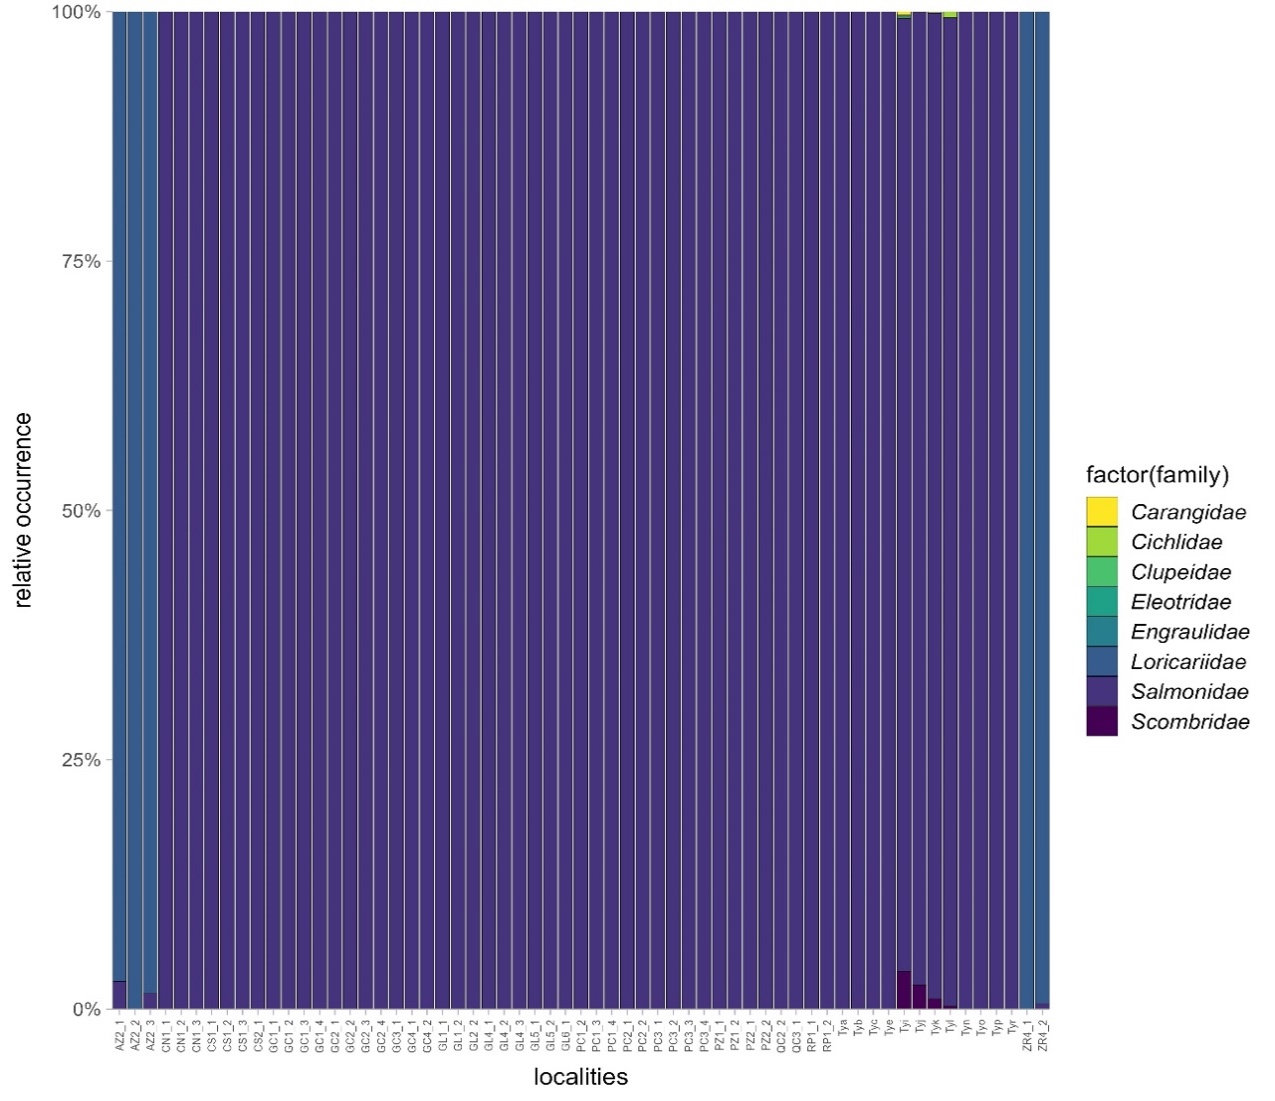


**Figure S3.** Saturation curves of MiSeq reads for (A) 12S (12S-V5) and (B) 16S (MiAmphi_L). The saturation shows sufficient sequence depth.


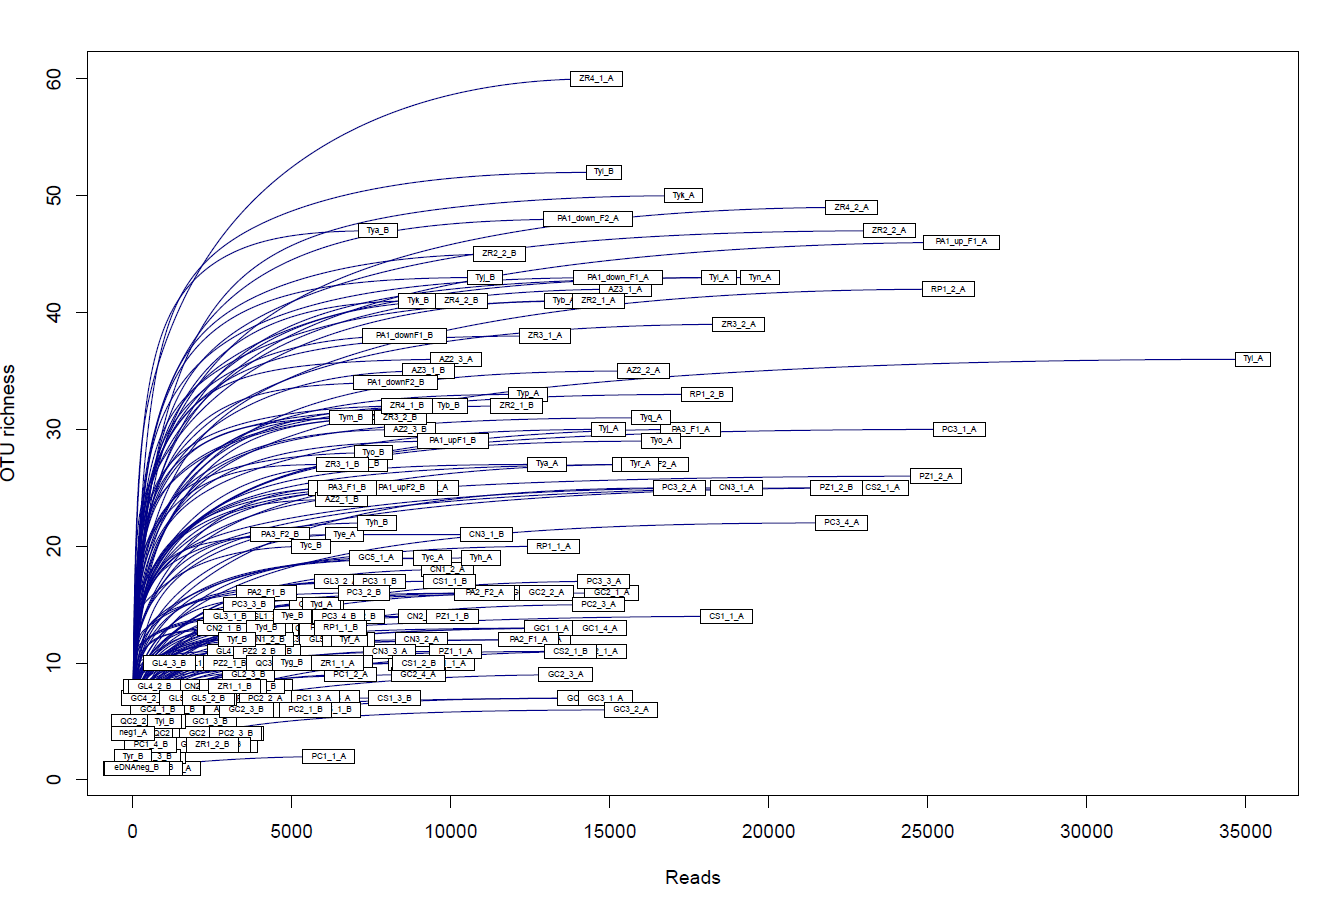


A

B


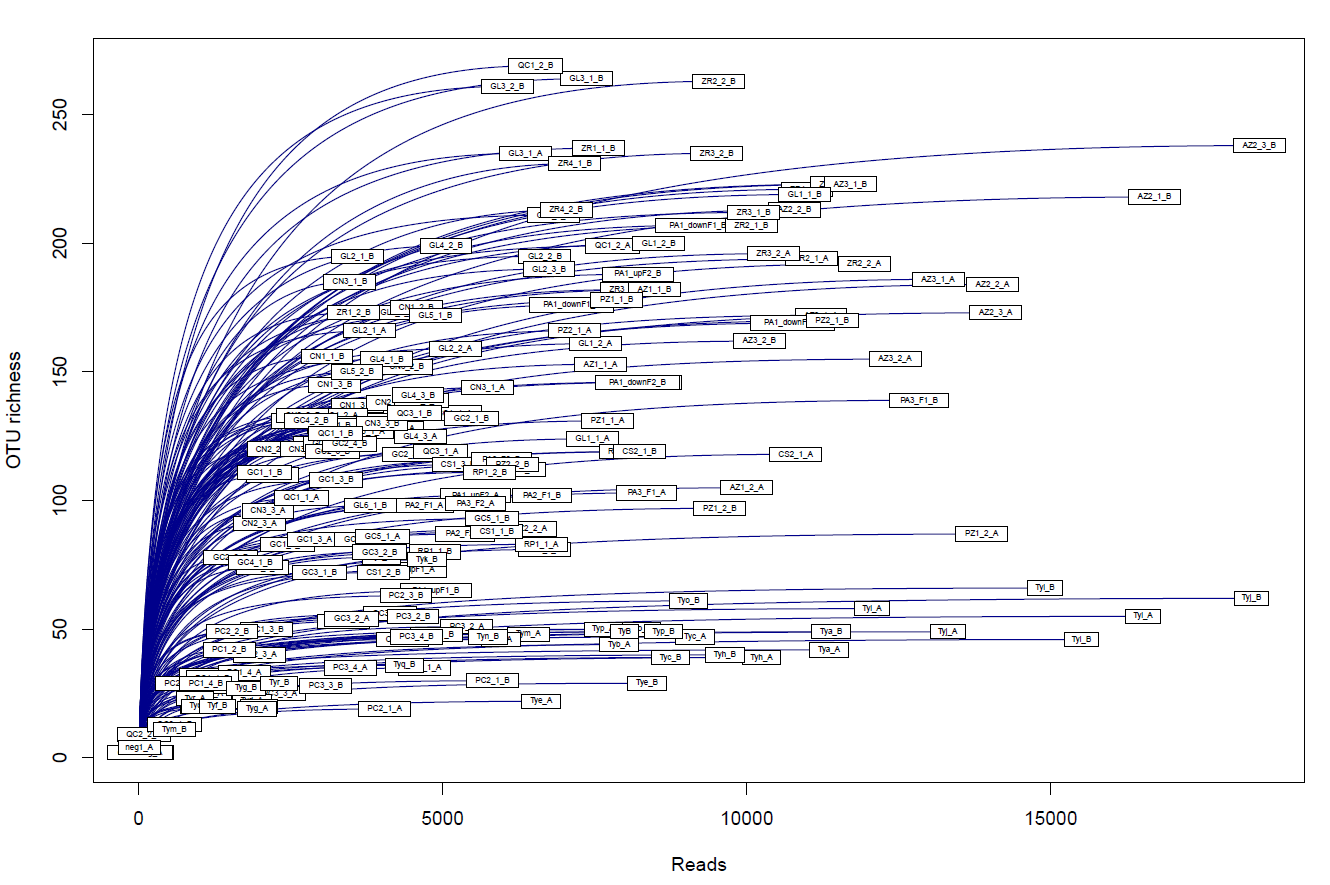


**Table S2.** Detection of *Batrachochytrium dendrobatidis* using quantitative PCR (see Methods section). For positive samples, the CT values and quantity in Genomic Equivalents is given.

| **locality** | **Cт value** | **Cт mean** | **Cт SD** | **quantity** | **quantity mean** | **quantity SD** |
| --- | --- | --- | --- | --- | --- | --- |
| AZ1.1 | Undetermined |  |  |  |  |  |
| AZ1.1 | Undetermined |  |  |  |  |  |
| AZ1.2 | Undetermined |  |  |  |  |  |
| AZ1.2 | Undetermined |  |  |  |  |  |
| AZ2.1 | Undetermined |  |  |  |  |  |
| AZ2.1 | Undetermined |  |  |  |  |  |
| AZ2.2 | 37.42240906 | 37.510498 | 0.12457664 | 20.2657547 | 19.15243721 | 1.57446873 |
| AZ2.2 | 37.59858704 | 37.510498 | 0.12457664 | 18.0391197 | 19.15243721 | 1.57446873 |
| AZ2.3 | 40.24267578 | 39.8181992 | 0.60030329 | 3.64863014 | 4.981184006 | 1.8845154 |
| AZ2.3 | 39.39371872 | 39.8181992 | 0.60030329 | 6.31373739 | 4.981184006 | 1.8845154 |
| AZ3.1 | 37.98734665 | 38.0333061 | 0.06499651 | 13.9532661 | 13.54221725 | 0.58131158 |
| AZ3.1 | 38.07926559 | 38.0333061 | 0.06499651 | 13.1311674 | 13.54221725 | 0.58131158 |
| AZ3.2 | 40.54317856 | 40.0807114 | 0.46246719 | 2.57857227 | 4.01996541 | 1.44139314 |
| AZ3.2 | 39.61824417 | 40.0807114 | 0.46246719 | 5.46135855 | 4.01996541 | 1.44139314 |
| CN1.1 | Undetermined |  |  |  |  |  |
| CN1.1 | Undetermined |  |  |  |  |  |
| CN1.2 | 37.14649582 | 38.776825 | 2.30563092 | 24.3178596 | 13.5694437 | 15.2005558 |
| CN1.2 | 40.40715027 | 38.776825 | 2.30563092 | 2.82102752 | 13.5694437 | 15.2005558 |
| CN1.3 | 36.02318954 | 36.7494736 | 1.02711797 | 51.0757065 | 35.31985092 | 22.2821445 |
| CN1.3 | 37.47575378 | 36.7494736 | 1.02711797 | 19.5639954 | 35.31985092 | 22.2821445 |
| CN2.1 | Undetermined |  |  |  |  |  |
| CN2.1 | Undetermined |  |  |  |  |  |
| CN2.2 | Undetermined |  |  |  |  |  |
| CN2.2 | Undetermined |  |  |  |  |  |
| CN2.3 | Undetermined |  |  |  |  |  |
| CN2.3 | Undetermined |  |  |  |  |  |
| CN3.1 | Undetermined |  |  |  |  |  |
| CN3.1 | Undetermined |  |  |  |  |  |
| CN3.2 | Undetermined |  |  |  |  |  |
| CN3.2 | Undetermined |  |  |  |  |  |
| CN3.3 | Undetermined |  |  |  |  |  |
| CN3.3 | Undetermined |  |  |  |  |  |
| CN3.4 | Undetermined |  |  |  |  |  |
| CN3.4 | Undetermined |  |  |  |  |  |
| CS1.1 | Undetermined |  |  |  |  |  |
| CS1.1 | Undetermined |  |  |  |  |  |
| CS1.2 | Undetermined |  |  |  |  |  |
| CS1.2 | Undetermined |  |  |  |  |  |
| CS1.3 | Undetermined |  |  |  |  |  |
| CS1.3 | Undetermined |  |  |  |  |  |
| CS2.1 | Undetermined |  |  |  |  |  |
| CS2.1 | Undetermined |  |  |  |  |  |
| field negative control | Undetermined |  |  |  |  |  |
| field negative control | Undetermined |  |  |  |  |  |
| GC1.1 | Undetermined |  |  |  |  |  |
| GC1.1 | Undetermined |  |  |  |  |  |
| GC1.2 | Undetermined |  |  |  |  |  |
| GC1.2 | Undetermined |  |  |  |  |  |
| GC1.3 | Undetermined |  |  |  |  |  |
| GC1.3 | Undetermined |  |  |  |  |  |
| GC1.4 | Undetermined |  |  |  |  |  |
| GC1.4 | Undetermined |  |  |  |  |  |
| GC2.1 | 37.72372437 | 38.0675011 | 0.48617369 | 18.5681038 | 15.23874283 | 4.70842791 |
| GC2.1 | 38.41127777 | 38.0675011 | 0.48617369 | 11.9093809 | 15.23874283 | 4.70842791 |
| GC2.2 | Undetermined |  |  |  |  |  |
| GC2.2 | Undetermined |  |  |  |  |  |
| GC2.3 | Undetermined |  |  |  |  |  |
| GC2.3 | Undetermined |  |  |  |  |  |
| GC2.4 | 40.47156525 | 40.2713318 | 0.28317016 | 2.70349741 | 3.112886429 | 0.57896334 |
| GC2.4 | 40.07110214 | 40.2713318 | 0.28317016 | 3.52227521 | 3.112886429 | 0.57896334 |
| GC3.1 | 37.29946136 | 37.5795212 | 0.3960644 | 21.9805126 | 18.58133125 | 4.80716848 |
| GC3.1 | 37.85958099 | 37.5795212 | 0.3960644 | 15.1821499 | 18.58133125 | 4.80716848 |
| GC3.2 | 36.474823 | 36.4123497 | 0.08835059 | 37.8996964 | 39.53027344 | 2.30598164 |
| GC3.2 | 36.3498764 | 36.4123497 | 0.08835059 | 41.1608467 | 39.53027344 | 2.30598164 |
| GC4.1 | Undetermined |  |  |  |  |  |
| GC4.1 | Undetermined |  |  |  |  |  |
| GC4.2 | Undetermined |  |  |  |  |  |
| GC4.2 | Undetermined |  |  |  |  |  |
| GL1.1 | Undetermined |  |  |  |  |  |
| GL1.1 | Undetermined |  |  |  |  |  |
| GL1.2 | Undetermined |  |  |  |  |  |
| GL1.2 | Undetermined |  |  |  |  |  |
| Gl2.1 | Undetermined |  |  |  |  |  |
| Gl2.1 | Undetermined |  |  |  |  |  |
| GL2.2 | Undetermined |  |  |  |  |  |
| GL2.2 | Undetermined |  |  |  |  |  |
| GL2.3 | Undetermined |  |  |  |  |  |
| GL2.3 | Undetermined |  |  |  |  |  |
| GL3.1 | Undetermined |  |  |  |  |  |
| GL3.1 | Undetermined |  |  |  |  |  |
| GL3.2 | Undetermined |  |  |  |  |  |
| GL3.2 | Undetermined |  |  |  |  |  |
| GL4.1 | Undetermined |  |  |  |  |  |
| GL4.1 | Undetermined |  |  |  |  |  |
| GL4.2 | Undetermined |  |  |  |  |  |
| GL4.2 | Undetermined |  |  |  |  |  |
| GL4.3 | 41.93375778 | 41.9749451 | 0.05824492 | 1.02897942 | 1.001730442 | 0.03853587 |
| GL4.3 | 42.01612854 | 41.9749451 | 0.05824492 | 0.97448146 | 1.001730442 | 0.03853587 |
| GL5.1 | Undetermined |  |  |  |  |  |
| GL5.1 | Undetermined |  |  |  |  |  |
| GL5.2 | Undetermined |  |  |  |  |  |
| GL5.2 | Undetermined |  |  |  |  |  |
| GL6.1 | Undetermined |  |  |  |  |  |
| GL6.1 | Undetermined |  |  |  |  |  |
| negative_control_1 | Undetermined |  |  |  |  |  |
| negative_control_1 | Undetermined |  |  |  |  |  |
| negative_control_2 | Undetermined |  |  |  |  |  |
| negative_control_2 | Undetermined |  |  |  |  |  |
| PA1down F1 | 33.27842712 | 33.1983185 | 0.11328803 | 313.124634 | 330.6044006 | 24.7201233 |
| PA1down F1 | 33.11821365 | 33.1983185 | 0.11328803 | 348.084167 | 330.6044006 | 24.7201233 |
| PA1down F2 | 30.83517647 | 30.7022018 | 0.18805587 | 1572.94312 | 1724.006348 | 213.63559 |
| PA1down F2 | 30.56922531 | 30.7022018 | 0.18805587 | 1875.06946 | 1724.006348 | 213.63559 |
| PA1up F1 | Undetermined |  |  |  |  |  |
| PA1up F1 | Undetermined |  |  |  |  |  |
| PA1up F2 | 34.74259186 | 34.5560684 | 0.26378667 | 119.023331 | 135.6554565 | 23.5213776 |
| PA1up F2 | 34.36954117 | 34.5560684 | 0.26378667 | 152.287582 | 135.6554565 | 23.5213776 |
| PA2 F1 | Undetermined |  |  |  |  |  |
| PA2 F1 | Undetermined |  |  |  |  |  |
| PA2 F2 | 38.49341202 | 38.6737671 | 0.99767923 | 9.98803616 | 10.11112976 | 4.81103086 |
| PA2 F2 | 37.96985245 | 38.6737671 | 0.99767923 | 14.1154642 | 10.11112976 | 4.81103086 |
| PA3 F1 | 38.39548111 | 38.8683643 | 0.47288322 | 12.0315228 | 8.868071079 | 3.16345167 |
| PA3 F1 | 39.34124756 | 38.8683643 | 0.47288322 | 5.70461941 | 8.868071079 | 3.16345167 |
| PA3 F2 | 38.81372452 | 38.2306747 | 0.8245542 | 8.08311749 | 12.77357864 | 6.63331461 |
| PA3 F2 | 37.64762878 | 38.2306747 | 0.8245542 | 17.4640408 | 12.77357864 | 6.63331461 |
| PC1.1 | Undetermined |  |  |  |  |  |
| PC1.1 | Undetermined |  |  |  |  |  |
| PC1.2 | Undetermined |  |  |  |  |  |
| PC1.2 | Undetermined |  |  |  |  |  |
| PC1.3 | Undetermined |  |  |  |  |  |
| PC1.3 | Undetermined |  |  |  |  |  |
| PC1.4 | Undetermined |  |  |  |  |  |
| PC1.4 | Undetermined |  |  |  |  |  |
| PC2.1 | Undetermined |  |  |  |  |  |
| PC2.1 | Undetermined |  |  |  |  |  |
| PC2.2 | Undetermined |  |  |  |  |  |
| PC2.2 | Undetermined |  |  |  |  |  |
| PC2.3 | Undetermined |  |  |  |  |  |
| PC2.3 | Undetermined |  |  |  |  |  |
| PC3.1 | Undetermined |  |  |  |  |  |
| PC3.1 | Undetermined |  |  |  |  |  |
| PC3.2 | Undetermined |  |  |  |  |  |
| PC3.2 | Undetermined |  |  |  |  |  |
| PC3.3 | Undetermined |  |  |  |  |  |
| PC3.3 | Undetermined |  |  |  |  |  |
| PC3.4 | Undetermined |  |  |  |  |  |
| PC3.4 | Undetermined |  |  |  |  |  |
| positive_control_1 | 31.92325401 | 32.0819054 | 0.22436824 | 766.534058 | 694.0543213 | 102.501823 |
| positive_control_1 | 32.24055862 | 32.0819054 | 0.22436824 | 621.574585 | 694.0543213 | 102.501823 |
| positive_control_2 | 28.36338043 | 28.0873871 | 0.39031354 | 7845.32471 | 9525.769531 | 2376.5083 |
| positive_control_2 | 27.81139374 | 28.0873871 | 0.39031354 | 11206.2148 | 9525.769531 | 2376.5083 |
| PZ1.1 | Undetermined |  |  |  |  |  |
| PZ1.1 | Undetermined |  |  |  |  |  |
| PZ1.2 | Undetermined |  |  |  |  |  |
| PZ1.2 | Undetermined |  |  |  |  |  |
| PZ2.1 | Undetermined |  |  |  |  |  |
| PZ2.1 | Undetermined |  |  |  |  |  |
| PZ2.2 | Undetermined |  |  |  |  |  |
| PZ2.2 | Undetermined |  |  |  |  |  |
| QC1.1 | Undetermined |  |  |  |  |  |
| QC1.1 | Undetermined |  |  |  |  |  |
| QC1.2 | Undetermined |  |  |  |  |  |
| QC1.2 | Undetermined |  |  |  |  |  |
| QC2.2 | Undetermined |  |  |  |  |  |
| QC2.2 | Undetermined |  |  |  |  |  |
| QC2.2 | Undetermined |  |  |  |  |  |
| QC2.2 | Undetermined |  |  |  |  |  |
| QC3.1 | Undetermined |  |  |  |  |  |
| QC3.1 | Undetermined |  |  |  |  |  |
| RP1.1 | Undetermined |  |  |  |  |  |
| RP1.1 | Undetermined |  |  |  |  |  |
| RP1.2 | Undetermined |  |  |  |  |  |
| RP1.2 | Undetermined |  |  |  |  |  |
| TYa | Undetermined |  |  |  |  |  |
| TYa | Undetermined |  |  |  |  |  |
| TYb | Undetermined |  |  |  |  |  |
| TYb | Undetermined |  |  |  |  |  |
| TYc | 36.12215424 | 36.5639343 | 0.62476867 | 47.8432121 | 37.26567078 | 14.9588995 |
| TYc | 37.0057106 | 36.5639343 | 0.62476867 | 26.6881332 | 37.26567078 | 14.9588995 |
| TYd | Undetermined |  |  |  |  |  |
| TYd | Undetermined |  |  |  |  |  |
| TYe | Undetermined |  |  |  |  |  |
| TYe | Undetermined |  |  |  |  |  |
| TYf | 38.13918304 | 37.9696426 | 0.23976365 | 12.6215401 | 14.20604515 | 2.24082923 |
| TYf | 37.80010605 | 37.9696426 | 0.23976365 | 15.7905512 | 14.20604515 | 2.24082923 |
| TYg | 40.59086227 | 40.153801 | 0.61809534 | 2.49860907 | 3.474984646 | 1.38080359 |
| TYg | 39.71674347 | 40.153801 | 0.61809534 | 4.45136023 | 3.474984646 | 1.38080359 |
| TYh | 39.51967621 | 39.4326153 | 0.08706093 | 5.07029819 | 5.791775703 | 0.72147751 |
| TYh | 39.34555435 | 39.4326153 | 0.08706093 | 6.51325321 | 5.791775703 | 0.72147751 |
| TYi | 37.59116364 | 37.5756683 | 0.02191366 | 20.2280769 | 20.43258095 | 0.28921235 |
| TYi | 37.56017303 | 37.5756683 | 0.02191366 | 20.637085 | 20.43258095 | 0.28921235 |
| TYj | Undetermined |  |  |  |  |  |
| TYj | Undetermined |  |  |  |  |  |
| TYk | 37.93104935 | 38.6536026 | 1.02184463 | 16.2407837 | 11.3132782 | 6.96854591 |
| TYk | 39.37615585 | 38.6536026 | 1.02184463 | 6.38577175 | 11.3132782 | 6.96854591 |
| TYl | Undetermined |  |  |  |  |  |
| TYl | Undetermined |  |  |  |  |  |
| TYm | Undetermined |  |  |  |  |  |
| TYm | Undetermined |  |  |  |  |  |
| TYn | Undetermined |  |  |  |  |  |
| TYn | Undetermined |  |  |  |  |  |
| TYo | 38.03572464 | 37.6322174 | 0.57064271 | 13.5143671 | 18.27330017 | 6.73014688 |
| TYo | 37.22871399 | 37.6322174 | 0.57064271 | 23.0322323 | 18.27330017 | 6.73014688 |
| TYp | 38.93077469 | 38.8178329 | 0.15972105 | 7.4816246 | 8.083646774 | 0.85138792 |
| TYp | 38.70489502 | 38.8178329 | 0.15972105 | 8.68566895 | 8.083646774 | 0.85138792 |
| TYq | 40.03094482 | 39.7297363 | 0.42597044 | 3.61696959 | 4.500973701 | 1.25017023 |
| TYq | 39.42853165 | 39.7297363 | 0.42597044 | 5.38497734 | 4.500973701 | 1.25017023 |
| TYr | Undetermined |  |  |  |  |  |
| TYr | Undetermined |  |  |  |  |  |
| ZR1.1 | Undetermined |  |  |  |  |  |
| ZR1.1 | Undetermined |  |  |  |  |  |
| ZR1.2 | Undetermined |  |  |  |  |  |
| ZR1.2 | Undetermined |  |  |  |  |  |
| ZR2.1 | 40.25336075 | 39.8544197 | 0.56418782 | 3.12270713 | 4.206334114 | 1.53248012 |
| ZR2.1 | 39.45547867 | 39.8544197 | 0.56418782 | 5.28996134 | 4.206334114 | 1.53248012 |
| ZR2.2 | Undetermined |  |  |  |  |  |
| ZR2.2 | Undetermined |  |  |  |  |  |
| ZR3.1 | 38.39191437 | 38.1915207 | 0.28339946 | 10.6807299 | 12.29959679 | 2.28942299 |
| ZR3.1 | 37.99112701 | 38.1915207 | 0.28339946 | 13.9184628 | 12.29959679 | 2.28942299 |
| ZR3.2 | Undetermined |  |  |  |  |  |
| ZR3.2 | Undetermined |  |  |  |  |  |
| ZR4.1 | Undetermined |  |  |  |  |  |
| ZR4.1 | Undetermined |  |  |  |  |  |
| ZR4.2 | Undetermined |  |  |  |  |  |
| ZR4.2 | Undetermined |  |  |  |  |  |
